# Supplementary material for: Spectrum of tablet computer use by medical students and residents at an academic medical center
Source: PeerJ. 2015 Jul 30;3:e1133. doi: 10.7717/peerj.1133 (PMC4525696; doi:10.7717/peerj.1133)
Supplement: Supplemental Information 1 [file peerj-03-1133-s001.xlsx]

## Sheet: Sheet1
Sample Question 1	What is your year of medical school?	LearnerType	UsesTablet		Do you use your tablet computer to access an outpatient electronic medical record (EMR)?	Do you use your tablet computer to access an inpatient electronic medical record (EMR)?	UseApps	HowOftenUseApps	AppRef	AppBoardStudy	AppEMR	AppCPOE	AppRad	AppClerkship	AppPtEd	AppSocial	What do you use medical apps for?	Do you read medical electronic books (ebooks) on your tablet computer?	How often do you use medical ebooks on your tablet computer?	What do you use medical ebooks for?
	Resident	R	1	1			2	S	1	1	1	0	1	1	1	1	Outpatient EMR Access, Inpatient EMR Access, Radiology Image viewing, Educational materials, General Medical Knowledge, Textbook/Reference, Techniques/Guides, Clinical exam/test findings, Classification/Treatment Algorithms, Patient Education, USMLE/Board Study, Industry Sponsored Information, News/Updates, Social Networking	Yes	Several times per day	Educational materials, General Medical Knowledge, Textbook/Reference, Techniques/Guides, Clinical exam/test findings, Classification/Treatment Algorithms, Patient Education, USMLE/Board Study, Industry Sponsored Information
	First Year	S	1	1			2	S	1	1	0	0	0	1	1	1	Clerkship materials, General Medical Knowledge, Textbook/Reference, Clinical exam/test findings, Patient Education, USMLE/Board Study, News/Updates, Social Networking	Yes	Weekly	Clerkship materials, General Medical Knowledge, Textbook/Reference, Techniques/Guides, USMLE/Board Study
	Third Year	S	1	1			2	S	1	1	0	0	0	1	1	1	Clerkship materials, General Medical Knowledge, Textbook/Reference, Clinical exam/test findings, Classification/Treatment Algorithms, Patient Education, USMLE/Board Study, News/Updates, Social Networking	Yes	Several times per day	Clerkship materials, General Medical Knowledge, Textbook/Reference, Clinical exam/test findings, Classification/Treatment Algorithms, Patient Education, USMLE/Board Study
	Resident	R	1	1			2	S	1	1	1	1	0	0	1	1	Outpatient EMR Access, Inpatient EMR Access, CPOE (Computerized physician order entry), Educational materials, General Medical Knowledge, Textbook/Reference, Techniques/Guides, Clinical exam/test findings, Classification/Treatment Algorithms, Coding and Billing, Patient Education, USMLE/Board Study, News/Updates, Social Networking	Yes	Several times per day	Educational materials, General Medical Knowledge, Textbook/Reference, Techniques/Guides, Clinical exam/test findings, Classification/Treatment Algorithms, Patient Education
	Resident	R	1	1			2	S	1	1	1	1	0	0	1	1	Inpatient EMR Access, CPOE (Computerized physician order entry), Educational materials, General Medical Knowledge, Textbook/Reference, Techniques/Guides, Clinical exam/test findings, Classification/Treatment Algorithms, Patient Education, USMLE/Board Study, News/Updates, Social Networking	Yes	Several times per day	Educational materials, General Medical Knowledge, Textbook/Reference, Techniques/Guides, Clinical exam/test findings, Classification/Treatment Algorithms, Patient Education, USMLE/Board Study
	Fellow	F	1	1			2	S	1	0	1	0	0	0	1	1	Inpatient EMR Access, Educational materials, General Medical Knowledge, Textbook/Reference, Techniques/Guides, Classification/Treatment Algorithms, Coding and Billing, Patient Education, News/Updates, Social Networking	Yes	Several times per day	Educational materials, General Medical Knowledge, Textbook/Reference, Classification/Treatment Algorithms, Patient Education
	Resident	R	1	1			2	D	1	1	1	1	1	1	0	1	Outpatient EMR Access, Radiology Image viewing, CPOE (Computerized physician order entry), Educational materials, General Medical Knowledge, Textbook/Reference, USMLE/Board Study, News/Updates, Social Networking	Yes	Weekly	Educational materials, Textbook/Reference, Clinical exam/test findings, USMLE/Board Study
	Resident	R	1	1			2	D	1	1	1	1	1	1	0	1	Outpatient EMR Access, Inpatient EMR Access, Radiology Image viewing, CPOE (Computerized physician order entry), Educational materials, General Medical Knowledge, Clinical exam/test findings, Classification/Treatment Algorithms, USMLE/Board Study, News/Updates, Social Networking	Yes	Weekly	Educational materials
	Resident	R	1	2			2	S	1	1	1	1	1	1	0	1	Outpatient EMR Access, Inpatient EMR Access, Radiology Image viewing, CPOE (Computerized physician order entry), Educational materials, General Medical Knowledge, Textbook/Reference, Techniques/Guides, Clinical exam/test findings, Classification/Treatment Algorithms, USMLE/Board Study, News/Updates, Social Networking	Yes	Several times per day	Educational materials, General Medical Knowledge, Textbook/Reference, Techniques/Guides, Clinical exam/test findings, Classification/Treatment Algorithms, USMLE/Board Study
	Fourth Year	S	1	1			2	W	1	1	1	1	1	1	0	1	Inpatient EMR Access, Radiology Image viewing, CPOE (Computerized physician order entry), Clerkship materials, General Medical Knowledge, Textbook/Reference, USMLE/Board Study, News/Updates, Social Networking	Yes	Weekly	Clerkship materials, General Medical Knowledge, USMLE/Board Study
	Resident	R	1	2			2	S	1	0	1	1	1	1	0	1	Inpatient EMR Access, Radiology Image viewing, CPOE (Computerized physician order entry), Educational materials, General Medical Knowledge, Textbook/Reference, Techniques/Guides, Clinical exam/test findings, News/Updates, Social Networking	Yes	Weekly	Educational materials, General Medical Knowledge, Textbook/Reference, Techniques/Guides, Classification/Treatment Algorithms
	Third Year	S	1	1			2	D	1	1	1	0	1	1	0	1	Inpatient EMR Access, Radiology Image viewing, Clerkship materials, General Medical Knowledge, Textbook/Reference, Techniques/Guides, Clinical exam/test findings, Classification/Treatment Algorithms, USMLE/Board Study, News/Updates, Social Networking	Yes	Weekly	Clerkship materials, General Medical Knowledge, Textbook/Reference, Clinical exam/test findings, USMLE/Board Study
	Fourth Year	S	1	1			2	S	1	1	1	0	1	1	0	1	Inpatient EMR Access, Radiology Image viewing, Clerkship materials, General Medical Knowledge, Textbook/Reference, Techniques/Guides, Clinical exam/test findings, Classification/Treatment Algorithms, USMLE/Board Study, News/Updates, Social Networking	Yes	Several times per day	Clerkship materials, General Medical Knowledge, Textbook/Reference, Techniques/Guides, Classification/Treatment Algorithms, USMLE/Board Study
	Resident	R	1	1			2	S	1	1	1	0	1	1	0	1	Inpatient EMR Access, Radiology Image viewing, Educational materials, General Medical Knowledge, Textbook/Reference, Coding and Billing, USMLE/Board Study, Social Networking	Yes	Several times per day	Educational materials, General Medical Knowledge, Textbook/Reference
	Fourth Year	S	1	1			2	W	1	1	1	0	1	1	0	1	Inpatient EMR Access, Radiology Image viewing, Clerkship materials, General Medical Knowledge, Textbook/Reference, Clinical exam/test findings, Classification/Treatment Algorithms, USMLE/Board Study, News/Updates, Social Networking	Yes	Daily	Clerkship materials, General Medical Knowledge, Textbook/Reference, USMLE/Board Study
	Resident	R	1	1			2	S	1	0	1	0	1	1	0	1	Inpatient EMR Access, Radiology Image viewing, Educational materials, General Medical Knowledge, Textbook/Reference, Techniques/Guides, Clinical exam/test findings, Classification/Treatment Algorithms, News/Updates, Social Networking	Yes	Several times per day	Educational materials, General Medical Knowledge, Textbook/Reference, Techniques/Guides, Clinical exam/test findings, USMLE/Board Study
	Third Year	S	1	1			2	S	1	1	1	0	0	1	0	1	Outpatient EMR Access, Inpatient EMR Access, Clerkship materials, General Medical Knowledge, Textbook/Reference, USMLE/Board Study, News/Updates, Social Networking	Yes	Daily	Clerkship materials, General Medical Knowledge, Textbook/Reference, Clinical exam/test findings, USMLE/Board Study
	Fourth Year	S	1	2			2	D	1	1	0	0	0	1	0	1	Clerkship materials, General Medical Knowledge, Textbook/Reference, Clinical exam/test findings, Classification/Treatment Algorithms, USMLE/Board Study, News/Updates, Social Networking	Yes	Weekly	Clerkship materials, General Medical Knowledge, Textbook/Reference, Clinical exam/test findings, Classification/Treatment Algorithms, USMLE/Board Study
	Resident	R	1	1			2	D	1	1	0	0	0	1	0	1	Educational materials, General Medical Knowledge, Textbook/Reference, USMLE/Board Study, News/Updates, Social Networking	Yes	Daily	Educational materials, General Medical Knowledge, Textbook/Reference, Techniques/Guides, USMLE/Board Study
	Third Year	S	1	1			2	S	1	1	0	0	0	1	0	1	Clerkship materials, General Medical Knowledge, Textbook/Reference, Techniques/Guides, Clinical exam/test findings, USMLE/Board Study, News/Updates, Social Networking	Yes	Several times per day	Clerkship materials, General Medical Knowledge, Textbook/Reference, Clinical exam/test findings, USMLE/Board Study
	Resident	R	1	1			2	S	1	1	0	0	0	1	0	1	Educational materials, Textbook/Reference, USMLE/Board Study, Social Networking	Yes	Daily	Educational materials, USMLE/Board Study
	Third Year	S	1	1			2	D	1	0	0	0	0	1	0	1	Clerkship materials, General Medical Knowledge, Textbook/Reference, News/Updates, Social Networking	Yes	Weekly	Clerkship materials, General Medical Knowledge, Textbook/Reference
	Resident	R	1	1			2	S	1	0	1	1	1	0	0	1	Outpatient EMR Access, Inpatient EMR Access, Radiology Image viewing, CPOE (Computerized physician order entry), Educational materials, General Medical Knowledge, Textbook/Reference, News/Updates, Social Networking	Yes	Weekly	Educational materials, General Medical Knowledge, Textbook/Reference, Techniques/Guides
	Resident	R	1	1			2	D	1	0	1	0	1	0	0	1	Outpatient EMR Access, Inpatient EMR Access, Radiology Image viewing, General Medical Knowledge, Textbook/Reference, Clinical exam/test findings, Classification/Treatment Algorithms, News/Updates, Social Networking	Yes	Weekly	Educational materials, General Medical Knowledge, Textbook/Reference, Techniques/Guides, Clinical exam/test findings, Classification/Treatment Algorithms
	Fourth Year	S	1	1			2	D	1	0	1	0	1	0	0	1	Outpatient EMR Access, Inpatient EMR Access, Radiology Image viewing, General Medical Knowledge, Clinical exam/test findings, Classification/Treatment Algorithms, Patient Education, Social Networking	Yes	Daily	General Medical Knowledge, Textbook/Reference, Techniques/Guides, Clinical exam/test findings, Classification/Treatment Algorithms
	Second Year	S	0	0			0	D	1	1		0	0	0	0	1	Textbook/Reference, USMLE/Board Study, News/Updates, Social Networking, email	Yes	Weekly	Textbook/Reference
	Fourth Year	S	0	0			2	D	1	1	0	0	0	0	0	1	Classification/Treatment Algorithms, USMLE/Board Study, News/Updates, Social Networking	Yes	Weekly	Clerkship materials, Textbook/Reference, USMLE/Board Study
	Second Year	S	1	1			2	S	1	1	0	0	0	0	0	1	General Medical Knowledge, Textbook/Reference, Techniques/Guides, Clinical exam/test findings, Classification/Treatment Algorithms, USMLE/Board Study, News/Updates, Social Networking	Yes	Weekly	General Medical Knowledge, Textbook/Reference, Techniques/Guides, Clinical exam/test findings, Patient Education, USMLE/Board Study
	Third Year	S	1	2			2	W	1	1	0	0	0	0	0	1	Textbook/Reference, USMLE/Board Study, News/Updates, Social Networking	Yes	Daily	General Medical Knowledge, Textbook/Reference, USMLE/Board Study
	Fourth Year	S	0	0			0	N	1	0	0	0	0	0	0	1	General Medical Knowledge, Textbook/Reference, Techniques/Guides, Classification/Treatment Algorithms, News/Updates, Social Networking	Not Sure	Never	Clerkship materials, General Medical Knowledge, Textbook/Reference
	Fourth Year	S	1	1			2	S	1	0	0	0	0	0	0	1	General Medical Knowledge, Textbook/Reference, News/Updates, Social Networking	Yes	Daily	General Medical Knowledge, Textbook/Reference, Techniques/Guides, USMLE/Board Study
	Third Year	S	1	1			2	S	1	1	1	1	1	1	1	0	Inpatient EMR Access, Radiology Image viewing, CPOE (Computerized physician order entry), Clerkship materials, General Medical Knowledge, Textbook/Reference, Clinical exam/test findings, Patient Education, USMLE/Board Study	Yes	Several times per day	Clerkship materials, General Medical Knowledge, Textbook/Reference, Clinical exam/test findings, Classification/Treatment Algorithms, USMLE/Board Study
	Resident	R	1	1			2	D	1	0	1	0	1	1	1	0	Outpatient EMR Access, Inpatient EMR Access, Radiology Image viewing, Educational materials, Textbook/Reference, Techniques/Guides, Clinical exam/test findings, Classification/Treatment Algorithms, Patient Education	Yes	Monthly	General Medical Knowledge, Textbook/Reference, Classification/Treatment Algorithms
	Fourth Year	S	1	1			2	S	1	1	1	0	0	1	1	0	Inpatient EMR Access, Clerkship materials, General Medical Knowledge, Textbook/Reference, Techniques/Guides, Clinical exam/test findings, Patient Education, USMLE/Board Study, News/Updates	Yes	Several times per day	Clerkship materials, General Medical Knowledge, Textbook/Reference, USMLE/Board Study
	Resident	R	1	1			2	S	1	0	1	1	1	0	1	0	Outpatient EMR Access, Inpatient EMR Access, Radiology Image viewing, CPOE (Computerized physician order entry), General Medical Knowledge, Textbook/Reference, Techniques/Guides, Classification/Treatment Algorithms, Patient Education	No
	Resident	R	1	1			2	S	1	1	1	0	0	0	1	0	Outpatient EMR Access, Inpatient EMR Access, Educational materials, General Medical Knowledge, Patient Education, USMLE/Board Study, Industry Sponsored Information	Yes	Weekly	General Medical Knowledge, Textbook/Reference, Patient Education
	Resident	R	1	2			2	D	1	1	1	1	1	1	0	0	Inpatient EMR Access, Radiology Image viewing, CPOE (Computerized physician order entry), Educational materials, General Medical Knowledge, Textbook/Reference, Classification/Treatment Algorithms, USMLE/Board Study	Yes	Weekly	General Medical Knowledge, Textbook/Reference, Classification/Treatment Algorithms, USMLE/Board Study
	Resident	R	1	1			2	D	1	1	1	1	1	1	0	0	Outpatient EMR Access, Inpatient EMR Access, Radiology Image viewing, CPOE (Computerized physician order entry), Educational materials, General Medical Knowledge, Textbook/Reference, Techniques/Guides, USMLE/Board Study	Yes	Daily	Educational materials, General Medical Knowledge, Textbook/Reference, Techniques/Guides, USMLE/Board Study
	Resident	R	1	1			2	D	1	1	1	1	1	1	0	0	Outpatient EMR Access, Inpatient EMR Access, Radiology Image viewing, CPOE (Computerized physician order entry), Educational materials, Textbook/Reference, USMLE/Board Study	Yes	Weekly	Educational materials, General Medical Knowledge, Textbook/Reference, USMLE/Board Study
	Resident	R	1	1			2	S	1	0	1	1	1	1	0	0	Inpatient EMR Access, Radiology Image viewing, CPOE (Computerized physician order entry), Educational materials, General Medical Knowledge, Textbook/Reference, Techniques/Guides, Classification/Treatment Algorithms	Yes	Several times per day	Educational materials, General Medical Knowledge, Textbook/Reference, Techniques/Guides, Classification/Treatment Algorithms
	Third Year	S	1	1			2	S	1	1	1	0	1	1	0	0	Outpatient EMR Access, Inpatient EMR Access, Radiology Image viewing, Clerkship materials, General Medical Knowledge, Textbook/Reference, Techniques/Guides, Clinical exam/test findings, Classification/Treatment Algorithms, USMLE/Board Study, News/Updates	Yes	Several times per day	Clerkship materials, General Medical Knowledge, Textbook/Reference, Techniques/Guides, Clinical exam/test findings, Classification/Treatment Algorithms, Patient Education, USMLE/Board Study
	Resident	R	1	1			2	D	1	1	1	1	0	1	0	0	Inpatient EMR Access, CPOE (Computerized physician order entry), Educational materials, Textbook/Reference, Techniques/Guides, USMLE/Board Study	Yes	Daily	Educational materials, Textbook/Reference, Techniques/Guides, USMLE/Board Study
	Fourth Year	S	1	1			2	D	1	1	1	0	0	1	0	0	Inpatient EMR Access, Clerkship materials, General Medical Knowledge, Textbook/Reference, USMLE/Board Study, News/Updates	Yes	Weekly	Clerkship materials, General Medical Knowledge, Textbook/Reference, USMLE/Board Study
	Resident	R	1	1			2	S	1	1	1	0	0	1	0	0	Inpatient EMR Access, Radiology Image viewing, Educational materials, General Medical Knowledge, Textbook/Reference, Techniques/Guides, USMLE/Board Study, News/Updates	Yes	Weekly, I use online book and journal access more than true e-books	Educational materials, General Medical Knowledge, Textbook/Reference, Techniques/Guides, USMLE/Board Study, Industry Sponsored Information, I use online journal and book access more than true e-books
	Fourth Year	S	1	1			2	W	1	1	1	0	0	1	0	0	Outpatient EMR Access, Inpatient EMR Access, Clerkship materials, General Medical Knowledge, Textbook/Reference, USMLE/Board Study	Yes	Weekly	Clerkship materials, General Medical Knowledge, Textbook/Reference, Clinical exam/test findings, USMLE/Board Study
	Third Year	S	1	1			2	W	0	0	1	0	0	1	0	0	Inpatient EMR Access, Clerkship materials, General Medical Knowledge, USMLE/Board Study, News/Updates, Social Networking	No	Never
	Resident	R	1	2			2	D	1	0	1	0	0	1	0	0	Outpatient EMR Access, Inpatient EMR Access, Educational materials, Textbook/Reference	No	Never
	Third Year	S	1	2			2	D	1	1	0	0	0	1	0	0	Clerkship materials, General Medical Knowledge, Textbook/Reference, USMLE/Board Study, News/Updates	No
	Resident	R	1	2			2	W	1	1	0	0	0	1	0	0	Educational materials, General Medical Knowledge, Textbook/Reference, Techniques/Guides, USMLE/Board Study, News/Updates	Yes	Several times per day	Educational materials, General Medical Knowledge, Textbook/Reference, Techniques/Guides, USMLE/Board Study
	Resident	R	1	1			2	S	1	1	1	1	1		0	0	Outpatient EMR Access, Inpatient EMR Access, Radiology Image viewing, CPOE (Computerized physician order entry), Educational materials, General Medical Knowledge, Textbook/Reference, Classification/Treatment Algorithms, USMLE/Board Study	Yes	Several times per day	Educational materials, General Medical Knowledge, Textbook/Reference, USMLE/Board Study
	Resident	R	1	1			2	D	1	0	1	1	1	0	0	0	Outpatient EMR Access, Inpatient EMR Access, Radiology Image viewing, CPOE (Computerized physician order entry), Educational materials, General Medical Knowledge, Textbook/Reference, Clinical exam/test findings	Yes	Weekly	Educational materials, General Medical Knowledge, Textbook/Reference, Clinical exam/test findings, Classification/Treatment Algorithms
	Third Year	S	1	1			2	D	1	1	1	0	1	0	0	0	Outpatient EMR Access, Inpatient EMR Access, Radiology Image viewing, Clerkship materials, General Medical Knowledge, Textbook/Reference, Classification/Treatment Algorithms, USMLE/Board Study	Yes	Daily	Clerkship materials, General Medical Knowledge, Textbook/Reference, Classification/Treatment Algorithms, USMLE/Board Study
	Resident	R	0	0			1	M	1	0	1	0	1	0	0	0	Inpatient EMR Access, Radiology Image viewing, General Medical Knowledge	Not Sure	Monthly	Textbook/Reference, Techniques/Guides, Clinical exam/test findings, USMLE/Board Study
	Resident	R	1	1			2	S	1	1	0	0	1	0	0	0	Radiology Image viewing, Educational materials, General Medical Knowledge, Textbook/Reference, Classification/Treatment Algorithms, USMLE/Board Study	Yes	Daily	Educational materials, General Medical Knowledge, Textbook/Reference, Classification/Treatment Algorithms
	Fourth Year	S	1	1			2	S	1	0	0	0	1	0	0	0	Radiology Image viewing, Textbook/Reference	Yes	Daily	Textbook/Reference
	Resident	R	1	2			2	S	1	1	1	1	0	0	0	0	Outpatient EMR Access, Inpatient EMR Access, CPOE (Computerized physician order entry), General Medical Knowledge, Textbook/Reference, USMLE/Board Study	Yes	Several times per day	Educational materials, General Medical Knowledge, Techniques/Guides
	Fellow	F	1	1			2	S	1	0	1	1	0	0	0	0	Inpatient EMR Access, CPOE (Computerized physician order entry), General Medical Knowledge, Textbook/Reference	Yes	Weekly	Textbook/Reference
	Third Year	S	1	1			1	S	1	1	1	0	0	0	0	0	Outpatient EMR Access, Inpatient EMR Access, Clerkship materials, General Medical Knowledge, Textbook/Reference, Clinical exam/test findings, USMLE/Board Study, News/Updates, Social Networking	Yes	Several times per day	Clerkship materials, General Medical Knowledge, Textbook/Reference, USMLE/Board Study
	Third Year	S	1	1			2	S	1	1	1	0	0	0	0	0	Inpatient EMR Access, General Medical Knowledge, USMLE/Board Study, News/Updates	No	Never
	Resident	R	1	1			2	S	1	1	1	0	0	0	0	0	Inpatient EMR Access, Educational materials, General Medical Knowledge, Textbook/Reference, USMLE/Board Study	Yes	Several times per day	Educational materials, General Medical Knowledge, Textbook/Reference, Techniques/Guides, Clinical exam/test findings, USMLE/Board Study
	Fourth Year	S	1	2			2	W	1	1	1	0	0	0	0	0	Inpatient EMR Access, Clerkship materials, General Medical Knowledge, Textbook/Reference, USMLE/Board Study	Yes	Weekly	Clerkship materials, Textbook/Reference, USMLE/Board Study
	Second Year	S	1	1			2	D	1	1	0	0	0	0	0	0	General Medical Knowledge, Textbook/Reference, Classification/Treatment Algorithms, USMLE/Board Study, News/Updates	Yes	Weekly	General Medical Knowledge, Textbook/Reference
	Second Year	S	1	1			2	S	1	1	0	0	0	0	0	0	General Medical Knowledge, Textbook/Reference, USMLE/Board Study	Yes	Several times per day	General Medical Knowledge, Textbook/Reference, USMLE/Board Study
	Second Year	S	1	1			2	S	1	1	0	0	0	0	0	0	General Medical Knowledge, Textbook/Reference, USMLE/Board Study	Yes	Several times per day	General Medical Knowledge, Textbook/Reference, USMLE/Board Study
	Resident	R	1	1			2	S	1	1	0	0	0	0	0	0	Educational materials, General Medical Knowledge, Textbook/Reference, USMLE/Board Study, News/Updates	Yes	Several times per day	Educational materials, General Medical Knowledge, USMLE/Board Study
	Second Year	S	1	1			2	D	0	1	0	0	0	0	0	0	USMLE/Board Study	No	Never
	First Year	S	0	0			0	N	0	0	0	0	0	0	0	0		No	Never
	Fourth Year	S	0	0			0	N	0	0	0	0	0	0	0	0		No	Never
	Fourth Year	S	1	1			0	N	0	0	0	0	0	0	0	0		No	Never
	Second Year	S	1	1			0	N	0	0	0	0	0	0	0	0		Yes	Monthly	USMLE/Board Study
	Second Year	S	1	1			0	N	0	0	0	0	0	0	0	0		No	Never
	Second Year	S	1	1			0	N	0	0	0	0	0	0	0	0	N/A	Yes	Monthly	General Medical Knowledge, Textbook/Reference
	Fellow	F	0	0			1	N	0	0	0	0	0	0	0	0	NA	Not Sure
	Resident	R	0	0			1	N	0	0	0	0	0	0	0	0		Not Sure	Never
	First Year	S	0	0			0		0	0	0	0	0	0	0	0		Not Sure
	Fourth Year	S	0	0			0		0	0	0	0	0	0	0	0		No
	Second Year	S	0	0			0		0	0	0	0	0	0	0	0
	Second Year	S	0	0			0		0	0	0	0	0	0	0	0
	Resident	R	0	0			0		0	0	0	0	0	0	0	0
	First Year	S	0	0			1		0	0	0	0	0	0	0	0
	First Year	S	0	0			1		0	0	0	0	0	0	0	0
	First Year	S	0	0			1		0	0	0	0	0	0	0	0
	Fourth Year	S	0	0			1		0	0	0	0	0	0	0	0
	Fourth Year	S	0	0			1		0	0	0	0	0	0	0	0
	Fourth Year	S	0	0			1		0	0	0	0	0	0	0	0
	Fourth Year	S	0	0			1		0	0	0	0	0	0	0	0
	Fourth Year	S	0	0			1		0	0	0	0	0	0	0	0
	Fourth Year	S	0	0			1		0	0	0	0	0	0	0	0
	Fourth Year	S	0	0			1		0	0	0	0	0	0	0	0
	Fourth Year	S	0	0			1		0	0	0	0	0	0	0	0
	Fourth Year	S	0	0			1		0	0	0	0	0	0	0	0
	Fourth Year	S	0	0			1		0	0	0	0	0	0	0	0
	Second Year	S	0	0			1		0	0	0	0	0	0	0	0
	Second Year	S	0	0			1		0	0	0	0	0	0	0	0
	Second Year	S	0	0			1		0	0	0	0	0	0	0	0
	Second Year	S	0	0			1		0	0	0	0	0	0	0	0
	Second Year	S	0	0			1		0	0	0	0	0	0	0	0
	Second Year	S	0	0			1		0	0	0	0	0	0	0	0
	Second Year	S	0	0			1		0	0	0	0	0	0	0	0
	Second Year	S	0	0			1		0	0	0	0	0	0	0	0
	Third Year	S	0	0			1		0	0	0	0	0	0	0	0
	Third Year	S	0	0			1		0	0	0	0	0	0	0	0
	Third Year	S	0	0			1		0	0	0	0	0	0	0	0
	Third Year	S	0	0			1		0	0	0	0	0	0	0	0
	Third Year	S	0	0			1		0	0	0	0	0	0	0	0
	Third Year	S	0	0			1		0	0	0	0	0	0	0	0
	Third Year	S	0	0			1		0	0	0	0	0	0	0	0
	Fellow	F	0	0			1		0	0	0	0	0	0	0	0
	Fellow	F	0	0			1		0	0	0	0	0	0	0	0
	Fellow	F	0	0			1		0	0	0	0	0	0	0	0
	Resident	R	0	0			1		0	0	0	0	0	0	0	0
	Resident	R	0	0			1		0	0	0	0	0	0	0	0
	Resident	R	0	0			1		0	0	0	0	0	0	0	0
	Resident	R	0	0			1		0	0	0	0	0	0	0	0
	Resident	R	0	0			1		0	0	0	0	0	0	0	0
	Resident	R	0	0			1		0	0	0	0	0	0	0	0
	Resident	R	0	0			1		0	0	0	0	0	0	0	0
	Resident	R	0	0			1		0	0	0	0	0	0	0	0
	Resident	R	0	0			1		0	0	0	0	0	0	0	0
	Resident	R	0	0			1		0	0	0	0	0	0	0	0
	Resident	R	0	0			1		0	0	0	0	0	0	0	0
	Resident	R	0	0			1		0	0	0	0	0	0	0	0
	Resident	R	0	0			1		0	0	0	0	0	0	0	0
	Resident	R	0	0			1		0	0	0	0	0	0	0	0
	Resident	R	0	0			1		0	0	0	0	0	0	0	0
	Resident	R	0	0			1		0	0	0	0	0	0	0	0
	Resident	R	0	0			1		0	0	0	0	0	0	0	0
	Resident	R	0	0			1		0	0	0	0	0	0	0	0
	Resident	R	0	0			1		0	0	0	0	0	0	0	0
	Resident	R	0	0			1		0	0	0	0	0	0	0	0
	Resident	R	0	0			1		0	0	0	0	0	0	0	0
	Resident	R	0	0			1		0	0	0	0	0	0	0	0
	Resident	R	0	0			1		0	0	0	0	0	0	0	0
	Resident	R	0	0			1		0	0	0	0	0	0	0	0
	Resident	R	0	0			1		0	0	0	0	0	0	0	0
	Second Year	S	1	1			2	D	1	0	0	0	0	0	0	0	General Medical Knowledge, Textbook/Reference	No	Never
	Resident	R	0	0			0	N	1	0	0	0	0	0	0	0	General Medical Knowledge	No	Never
	Resident	R	1	1			2	S	1	0	0	0	0	0	0	0	General Medical Knowledge, Textbook/Reference	Yes	Daily	Textbook/Reference
	Second Year	S	1	1			2	W	1	0	0	0	0	0	0	0	General Medical Knowledge, Textbook/Reference, Clinical exam/test findings, USMLE/Board Study, News/Updates, Social Networking	Yes	Weekly	Textbook/Reference, Clinical exam/test findings, USMLE/Board Study
	Second Year	S	1	1			2	W	1	0	0	0	0	0	0	0	General Medical Knowledge, Techniques/Guides, Clinical exam/test findings	No	Never
	Second Year	S	1	1			2	W	1	0	0	0	0	0	0	0	General Medical Knowledge, Textbook/Reference, News/Updates, Social Networking	Yes	Weekly	General Medical Knowledge, Textbook/Reference
	Third Year	S	1	1			2	W	1	0	0	0	0	0	0	0	General Medical Knowledge, Textbook/Reference, Techniques/Guides, Clinical exam/test findings, USMLE/Board Study, News/Updates	Yes	Daily	Clerkship materials, General Medical Knowledge, Textbook/Reference, Techniques/Guides, Clinical exam/test findings, USMLE/Board Study
